# Supplementary material
Source: PubMed Central journal article supplement (PMC8688338)
Supplement: NIHMS1753774-supplement-supinfo.pdf [file NIHMS1753774-supplement-supinfo.pdf]

## Supplementary materials

### Accession Codes for phylogenetic tree:

#### *Trichomonas vaginalis*

TvagENT1 (TVAG\_166380), TvagENT2 (TVAG\_192810), TvagENT3 (TVAG\_271560), TvagENT4 (TVAG\_441760), TvagENT5 (TVAG\_483030), TvagENT6 (TVAG\_053320) TvagENT7 (TVAG\_101510), TvagENT8 (TVAG\_271570), TvagENT9 (TVAG\_341290)

#### *Trypanosoma brucei brucei*

TbNT2 (Tb.927.2.6150), TbNT3 (Tb.927.2.6200), TbNT4 (Tb.927.2.6220), TbNT5 (Tb.927.2.6240), TbNT6 (Tb927.2.6320), TbNT7 (Tb.927.6280), TbNBT8.1 (Tb927.11.3610), TbNBT8.2 (Tb927.11.3620), TbNBT8.3 (Tb.927.11.3620), TbNBT8.3(Tb.927.11.3630), TbNT9 (Tb.927.6.220), TbNT10 (Tb.927.9.7470), TbAT1 (Tb927.5.286b), TbNT12 (Tb927.3.590), TbNT11 (Tb927.3.590)

#### *Leishmania donovani*

LdNT1.1 (LdBPK\_151230.1), LdNT1.2 (LdBPK\_151250.1), LdNT2 (LdBPK\_362040.1), LdNT3 (LdBPK\_131110.1), LdNT4 (LdBPK\_110520.1)

hENT1 (Q99808-1), hENT2 (Q14542-1), hENT3 (Q9BZD2), hENT4 (BC047592.1)

PfNT1 (PF3D7\_1347200), PfNT2 (PF3D7\_0824400), PfNT3 (PF3D7\_1469400), PfNT4 (PF3D7\_0103200)

Supplemental Figure S1. Multiple alignment of the protein sequences of the TvagENTs, generated by CLUSTAL Omega (1.2.4). For TvagENT9, trans-membrane segments are highlighted (TrichDB).

|          |                                                                    |     |
|----------|--------------------------------------------------------------------|-----|
| TvagENT1 | MNSDDEAVTIDIEAQSPPKSPPRSPNTKSNLLDPFSFYSKGNSNVDTPKTPQKQKNSTEK       | 60  |
| TvagENT6 | MSQEDPQVVEDVESGEVKKDSEYT-----S---                                  | 25  |
| TvagENT3 | MNQEDPETMHDLEAEPEKSDE-----                                         | 21  |
| TvagENT2 | -----                                                              | 0   |
| TvagENT8 | MTQEDPAILHDVEAEPEKSES-----                                         | 21  |
| TvagENT7 | -----                                                              | 0   |
| TvagENT9 | -----MK---KELN                                                     | 6   |
| TvagENT4 | -----                                                              | 0   |
| TvagENT5 | -----                                                              | 0   |
|          |                                                                    |     |
| TvagENT1 | QPITPTKQSNADANSVHSR-DIEIPNEDEDKITFGIEAIFMLLGTNVLFSYNTFINGLDF       | 119 |
| TvagENT6 | ----DDKKSEESSTQLDNKDSEKKDDNIENRVTFTEIEMFFFLIGTNIILYSYNTFLNGNDF     | 81  |
| TvagENT3 | -----DLSKEMDE-----KKDDIDSRTIGIQLVFFFFIGINILFSYNTFLSGTDF            | 66  |
| TvagENT2 | -----                                                              | 0   |
| TvagENT8 | -----YSSKDLDNKS-DDKKSEDDVKISLGIQLIFFLIGTNIILFSYNTFLSGTDF           | 70  |
| TvagENT7 | ---M---ADMKEDPLLTPE-S-TPNKPSKKNENSESLMFFFLGNTSLLAFNIIINAIDI        | 51  |
| TvagENT9 | IPLM---SDSISDQLLEES---EAKKKAMPANPE <u>SLMFFFLGNTSLLCFNIIINAIDI</u> | 58  |
| TvagENT4 | ---M---TLLDNRQLLEEK-DILISDYSEMTDPDQALFFWLGNASLLVYNVINAIDI          | 52  |
| TvagENT5 | -----MFIDANKLIETS-SGAGEDVRTVSKSESWLFFWLGNVSLLVFNIAINAIDI           | 51  |
|          |                                                                    |     |
| TvagENT1 | YDTLFPGKN-----APTNIARAYNITASLIY--IFSLPFIERFT-L---VTRFYFSS          | 165 |
| TvagENT6 | FVKLFPE-----RDIGMELSRVLTISSGVCY--LITLFPFIEQFT-L---VSRMYAST         | 127 |
| TvagENT3 | YESITIGQKYTYGSLAKIQRDLPRVLILTSEFCN--LCSLPFIERFT-L---VSRLYFSL       | 120 |
| TvagENT2 | -----MFLRTSATLNGKSVTLNGRTSFR-L---VSRLYFAM                          | 32  |
| TvagENT8 | YGSLVGHQRYTYGGKVNIGRDLPRVLIITSETVN--LCSLPFIESFR-L---ISRLYFSM       | 124 |
| TvagENT7 | YAKKTNRSD-----MASLLNRSYNI PNALMALFLCIFKPTNYKISLISALASLTFIM         | 103 |
| TvagENT9 | YNKLTGRTD----- <u>MAGILNRTYNFPNALMALLCFFKPTNYKISIIIFALGSLSFIM</u>  | 110 |
| TvagENT4 | YIHLSHRKS-----VGNDLARAYNFPCLIALVLCFIKIPNQKILFIIISLLVLPFDL          | 104 |
| TvagENT5 | YAIITNDKN-----IGNDLNRAYNIPSSIAALILCFVTIRNHKRSFIISITSLIIV           | 103 |
|          | . : :                                                              |     |
|          |                                                                    |     |
| TvagENT1 | IGITIMMFFTFLYSNIGTPIYGVIIIGAAVFAALFSGILFGTTMGFAGLFGANCSVCTAG       | 225 |
| TvagENT6 | ILMAAVQIIVWIYVNVGTPKYQVYVYTLAALTSVAQSVLYGTSMGFAGLFGKTSAMANTG       | 187 |
| TvagENT3 | TMMAIVQIVIFYVNFNGPQYYIYLLAALTSAAQSVFMFGSSMGFAGLFGKTSALANTG         | 180 |
| TvagENT2 | TLMAIVQIVIFFYVNFNGPQYYIYLLAALTSAAQSVLFGSSMGFAGLFGDKTSALANTG        | 92  |
| TvagENT8 | TIMAIVQIVIFYVNFNGDPQYYIYLLAALTSAAQSVIFGSSMGFAGLFGDKTSALANTG        | 184 |
| TvagENT7 | CFLPIFLII---H-LNANAFLYLTLVVIGLTVISSLFSSIFSFASQFGPISSAMASSG         | 159 |
| TvagENT9 | <u>CFLPIFILII---D-IDDRVMFYLTLSIIGLTVISSLFSSVFSMASQFSPVSSAMASSG</u> | 166 |
| TvagENT4 | LAFPLLIII---P-MSESVVYWGTTAAITVSGVFSSIMSGSFAVSTQFADETAGFISAG        | 160 |
| TvagENT5 | SVMAASMIII---K-MPAKIVVYISVVISGLSGVFSAILSSSFALATQFAPESSTSVSSG       | 159 |
|          | : : . . . . . : : *                                                |     |
|          |                                                                    |     |
| TvagENT1 | LALGGLVTSIVRVLSKLM-----GKGEGWFYFGFTVVFNTCSVIAFILFKRRPIAIRRI        | 279 |
| TvagENT6 | VALGGLISSILRMISKTF-----PRGDGWFYFAFAVICTSSSAICFHIFNKTEICQERV        | 241 |
| TvagENT3 | VALGGLITSILWVIAKNAFNGS--LKKQGLFYLFVSVLVTISTLITFHFFFSKTEIGQERL      | 238 |
| TvagENT2 | VALGGLITSLLWVAKAAFPNS--VKNQGVFYLFVSCFVTVKTALTFHFFSRTEAAQKKL        | 150 |
| TvagENT8 | VALGGLITSLLWILAKGVFPNS--VRNQGFYLFVSCFVSIATAVTFHFFSRTEIAQKRL        | 242 |
| TvagENT7 | CGCCGVIASVLRITKAAAVTDRANLYSTCAYFFISAGIIFLTLVFFLFKMQKPEIRLKM        | 219 |
| TvagENT9 | <u>CGCCGVLASVLRITKAAIATGKANLYSTAAAYFFISAAIIFFTLIFVIRNPEIKEKL</u>   | 226 |
| TvagENT4 | NGLCGILAAVARIITKGLFSSESQKLISSIVYFALAALTLGLTILFFILKLRNPDISNRF       | 220 |
| TvagENT5 | NGLCGVLAALRITTKAVFSSESLKYSSFCYFILTAIILATLIYFIKKVNQPSISSKF          | 219 |
|          | . *::: : : * . *:: : : * . : .                                     |     |
|          |                                                                    |     |
| TvagENT1 | SHSHTSTDFLDRMKRIKGVFLKIWPVLEACLMMITLTLFPGYACSIKSKHGLSKDWVT         | 339 |
| TvagENT6 | KLAQTSSNFLVRMKRIGGVFKKIWPVLEGGFNMAITLTLFPGYAFYVGDHNN-LGDWYM        | 300 |

TvagENT3 KLAQTSNDFMFRMKRIKGVFLKIWPFVIEGWLHFAITLTFPPSYMFYAGNQHFKEFGDFI 298  
TvagENT2 KLAQTSNDFMYRVRRIKGVFLKIWPFVIEGWLHFAITLTFYPGYMFLAGNQHFKEFGWFT 210  
TvagENT8 KLAQTSNDFFRLLKRIKGVFLKIWPFVIEGWLHLTITLTFYPGYMFLAGNQHFKEFGWFT 302  
TvagENT7 IPASKSEKVAIFNRETLVVIKSIWVSWLSVFANFLITLSIFPGYVANT-RATKQIGDWT 278  
TvagENT9 VPKV-EEKVSIFSRRETITVIKSIWVSWLSVFANFLITLSIFPGYVTGT-YTPPKIRDWTF 284  
TvagENT4 IFNSYQKENTAFISQIFTTLKSIIWLLWIAEALTYFITLIIFPGYVCSG-PE-GPLKSWTF 278  
TvagENT5 IFPAETVDIKSFLRSLKGTFKHISLLWIGCVLDFMITLTIFPGYVCAG-PE-GALKSWNP 277

. : \* : \*\*\* :\*.\*

TvagENT1 TLVTSFYMVGDFGRFLFTRWWAWPSAKWLWVPHISRLIFFVLYIPIESVFL-EDDIFIY 398  
TvagENT6 TIILFMFMVGDFVGRFLITRWFWSWPSAKYLWIPHLRLLIFIVLYVCPVEGVFL-QDDIFID 359  
TvagENT3 TAVIFCYNVGDVFLGRFITRWFPPKPKYLWIPHLRLLFIPLIVVSAEVPKF-RSDIYMC 357  
TvagENT2 TVMILCYNIGDFVGRFMTRFFSWPKPKYLWIPHALRLLFIPLIVVSVVEVPKL-RSDILMC 269  
TvagENT8 TVMILCYNIGDFLGRFVTRFFLWPKPKYLWIPHALRLLFIPLIVVSVVEVPKL-RSDVYMC 361  
TvagENT7 VIVVTIFCVFDWVGRAGPGLFIWPPRKFAPWIPIVLRFLSYPIFIVSIQHKFK-AEPWTF 337  
TvagENT9 VIVVAIFCVFDWVGRAGSGLKVPRLFAWIPIVLRFFSFPFIIFSISIQKRFK-AEPWTF 343  
TvagENT4 VLITTVFCIFDFIGRFVASKFIWPSLNMSPLASVFRIFIFIPLEIISIQKIVNFREPWFTL 338  
TvagENT5 VCITTFFCIFDWLGRWLPKFLWPSLNLTIFPILRLLFFPIEIIISLQKVLNLGEPWFTL 337

. : : \*.\*\* :\* . \*:: : : .

TvagENT1 FVTLALALTGGFWIGLCITYTAKDEKLEEEDEVELAVFCTSLALNLGIFIGSWLTYALPTH 458  
TvagENT6 FVTLALSALTGGYWGGLCITYTATSEKLEKEEIDLAVFCTVLATNLGVFAGSWLTFAAQAG 419  
TvagENT3 VMAFLLAVTTGYFGGLCIVYTATCENLATEEIDLGVFTTVLATNLGVFTGVWLTFLSNL 417  
TvagENT2 IMAFLLSVTTGYFGGLCIVYTATSEKLEKEEIDLGVFTTVLATNLGVFKGVWLTFLSNL 329  
TvagENT8 IMSFLLAVTTGYFGGLCIVYTATSEKLEKEEIDLGVFTTVLATNLGVFTGVWLTFLSNL 421  
TvagENT7 GWMIPFALSNGYFGTVQMIYGSNPDELTLQKRFAGFLMSFAVNAGILCAMGLTFLLP 397  
TvagENT9 AWMIPFAISNGYFGTVQIIYGSNPDELNSEQKKFAGFIISFAVNAGILCAMGLTFLMPK 403  
TvagENT4 ALQIPFALTNGYVGTILMIYGSNHPDLSEKKLKLAGYLMTFAINVGI I I AMFLTFLPKP 398  
TvagENT5 FMQIPFAITNGYFGTTVMIIYASIHKPLTDEQKKTAGFMMSFAINFGI I I AMFLTYAMP 397

: :::: \*: : \* : .\* :: . . : : \* \* \*:: . \*\*:

TvagENT1 ----- 458  
TvagENT6 HK----- 421  
TvagENT3 HEKYSAP 424  
TvagENT2 HEKYSAP 336  
TvagENT8 HEKYSPO 428  
TvagENT7 PKFN--- 401  
TvagENT9 PEYNQ-- 408  
TvagENT4 SI----- 400  
TvagENT5 KA----- 399

**Supplemental Table 1: Primers for qRT-PCR amplification of native TvagENTs**

| <b>Gene</b> | <b>primer</b> | <b>F / R</b> | <b>Sequence</b>            |
|-------------|---------------|--------------|----------------------------|
| TvagENT1    | HKD908        | F            | CGCCCACCAAGCAGAGTAA        |
| TvagENT1    | HDK909        | R            | TCGGTATTTCTATGTCACGACTATGC |
| TvagENT2    | HDK910        | F            | GTGTCGGTGGGAAGTCCCTAAAC    |
| TvagENT2    | HDK911        | R            | CAGGAATGCCATAATGCACATC     |
| TvagENT3    | HDK912        | F            | CTCGCTGTGACAACGGGATA       |
| TvagENT3    | HDK913        | R            | TTCGCACGTAGCCGTATATACAA    |
| TvagENT4    | HDK914        | F            | GCGGAGGCACTTACATACTTCA     |
| TvagENT4    | HDK915        | R            | CGGTCCGCTGCACACAT          |
| TvagENT5    | HDK916        | F            | GGGTAGGTGGCTTCCATCAA       |
| TvagENT5    | HDK917        | R            | GCAAGAGAATCGGGAATATCGT     |
| TvagENT6    | HDK918        | F            | CGCTGGCGGCATTAACA          |
| TvagENT6    | HDK919        | R            | GCCCATGGAGGTACCATAAAGA     |
| TvagENT7    | HDK920        | F            | TGAAGATGATACCAGCCAGCAA     |
| TvagENT7    | HDK921        | R            | CAATGTTTCGCGGTTGAAAA       |
| TvagENT8    | HDK922        | F            | GGCCACGGAGGAGATTGA         |
| TvagENT8    | HDK923        | R            | CCAAGGTTGGTTGCCAGAAC       |
| TvagENT9    | HDK924        | F            | CGTTTTTTTTCCTCCCCATT       |
| TvagENT9    | HDK925        | R            | CACCACGGCTCGGCTTTA         |

**Supplemental Table 2: Primers to amplify TvagENTs to insert into pHD1336**

| <b>Gene</b> | <b>Number</b> | <b>F / R</b> | <b>Sequence</b>                         |
|-------------|---------------|--------------|-----------------------------------------|
| TvagENT1    | HKD1127       | F            | CAGTCTAGAATGAACAGTGACGACGAAGCTGTGA      |
| TvagENT1    | HDK1128       | R            | CAGGGATCCATGCGTGGGGAGAGCGTACG           |
| TvagENT2    | HDK1129       | F            | CAGTCTAGAATGTTTCTTCGGACTAGTGCCACC       |
| TvagENT2    | HDK1130       | R            | CAGGGATCCTGGGGCTGAGTATTTCTCATGGAG       |
| TvagENT3    | HDK1131       | F            | CAGTCTAGAATGAACCAAGAAGACCCTGAGACT       |
| TvagENT3    | HDK1132       | R            | CAGGGATCCGGGGCAGAATACTTCTCGTG           |
| TvagENT4    | HDK1133       | F            | CAGTCTAGAATGACTCTGTTAGATAATAGGCAGTTAC   |
| TvagENT4    | HDK1134       | R            | CAGGGATCCTATGGATGGCTTGGGCAGTATAAAT      |
| TvagENT5    | HDK1135       | F            | CAGTCTAGAATGTTTATAGACGCTAACCAAGCTCATC   |
| TvagENT5    | HDK1136       | R            | CAGGGATCCGGCCTTAGGAATCGGCATAG           |
| TvagENT6    | HDK1137       | F            | CAGTCTAGAATGTCGCAGGAGGACCCTCA           |
| TvagENT6    | HDK1138       | R            | CAGGGATCCTTTATGTCCGGCCTGTGCGG           |
| TvagENT7    | HDK1139       | F            | CAGTCTAGAATGGCAGATATGAAGGAAGACCCG       |
| TvagENT7    | HDK1140       | R            | CAGGGATCCAATTGAACTTCGGTGGCGTAGGC        |
| TvagENT8    | HDK1141       | F            | CAGTCTAGAATGACTCAGGAAGACCCCGCTAT        |
| TvagENT8    | HDK1142       | R            | CAGGGATCCTTACTGAGGACTGTACTTCTCATGAAGATT |
| TvagENT9    | HDK1143       | F            | CAGTCTAGAATGAAGAAGGAATTGAATATTCCTTG     |
| TvagENT9    | HDK1144       | R            | CAGGGATCCCTGGTTATATTCAGGGGGCTTC         |
